# Supplementary material
Source: MDPI journal article supplement (https://www.mdpi.com/2076-3263/13/6/184)
Supplement: s1 [file s1]

**Table S1.** Landsat images for land-use/land-cover (LULC) classification and detecting changes from 1990 to 2020.

| Satellite | Sensor | Resolution (m) | Path/Row | Acquisition Date | Cloud cover (%) |
|-----------|--------|----------------|----------|------------------|-----------------|
| Landsat 5 | TM     | 30 x30         | 166/053  | 18 December 1990 | 0               |
| Landsat 5 | TM     | 30 x30         | 166/054  | 20 January 1990  | 0               |
| Landsat 5 | TM     | 30 x30         | 166/055  | 20 January 1990  | 0               |
| Landsat 5 | TM     | 30 x30         | 167/053  | 27 January 1990  | 0               |
| Landsat 5 | TM     | 30 x30         | 167/054  | 25 December 1990 | 0               |
| Landsat 5 | TM     | 30 x30         | 166/053  | 14 January 2000  | 0               |
| Landsat 5 | TM     | 30 x30         | 166/054  | 15 February 2000 | 0               |
| Landsat 5 | TM     | 30 x30         | 166/055  | 14 January 2000  | 0               |
| Landsat 5 | TM     | 30 x30         | 167/053  | 22 December 2000 | 0               |
| Landsat 5 | TM     | 30 x30         | 167/054  | 05 January 2000  | 0               |
| Landsat 5 | TM     | 30 x30         | 166/053  | 25 January 2010  | 3               |
| Landsat 5 | TM     | 30 x30         | 166/054  | 25 January 2010  | 0               |
| Landsat 5 | TM     | 30 x30         | 166/055  | 11 December 2010 | 0               |
| Landsat 5 | TM     | 30 x30         | 167/053  | 02 December 2010 | 0               |
| Landsat 5 | TM     | 30 x30         | 167/054  | 18 December 2010 | 0               |
| Landsat 8 | OLI    | 30 x30*        | 166/053  | 06 December 2020 | 1               |
| Landsat 8 | OLI    | 30 x30         | 166/054  | 21 January 2020  | 0.1             |
| Landsat 8 | OLI    | 30 x30         | 166/055  | 05 January 2020  | 0.4             |
| Landsat 8 | OLI    | 30 x30         | 167/053  | 26 December 2020 | 0               |
| Landsat 8 | OLI    | 30 x30         | 167/054  | 29 February 2020 | 0               |

**Table S2.** LULC classes and their descriptions.

| LULC Class | Description                                                                                                                                                           |
|------------|-----------------------------------------------------------------------------------------------------------------------------------------------------------------------|
| Bare land  | Open areas with little or no vegetation cover, including barren lands, rocky or sandy areas, seashores, and landfill sites.                                           |
| Built-up   | Areas with built-up land (including those under construction) for public services, administration, transportation, industry, commercial or mixed uses, and residences |
| Cropland   | The land is allocated to the cultivation, including rain-fed or irrigated vegetables.                                                                                 |
| Forest     | Land covered by forest (both natural and planted) comprising > 0.5 ha reaching a height of more than two meters with a canopy cover of more than 20% [74]             |
| Grassland  | The land is utilized for grazing and pasture.                                                                                                                         |
| Shrubland  | Land with shrubs/bushes canopy cover $\leq 10\%$ or combined bush cover and shrubs $\leq 10\%$ [74].                                                                  |
| Waterbody  | Rivers, streams, drainages, lakes, reservoirs, swamp areas, and ponds                                                                                                 |

N.B: Forest and shrub classes that do not meet the area and canopy cover conditions were determined using predefined references and expert knowledge of the study area.

**Table S3.** Estimated soil erodibility (K) value for soil classes.

| Soil class        | DOMSOI | % of the area covered | K-value |
|-------------------|--------|-----------------------|---------|
| Chromic Vertisols | Vc     | 2                     | 0.8     |
| Eutric Nitisols   | Ne     | 10                    | 0.3     |
| Eutric Regosols   | Re     | 8                     | 0.8     |
| Calcaric Regosols | Rc     | 21                    | 0.9     |
| Calcic Xerosols   | Xk     | 2.6                   | 0.4     |
| Cambic Arenosols  | Qc     | 0.04                  | 0.8     |
| Dystric Cambisols | Bd     | 13.3                  | 0.4     |
| Eutric Cambisols  | Be     | 4                     | 1       |
| Haplic Xerosols   | Xh     | 33.4                  | 0.4     |
| Haplic Yermosols  | Yh     | 0.4                   | 0.8     |
| Humic Cambisols   | Bh     | 5.3                   | 0.3     |

**Table S4.** The C-factor values for LULC classes.

| LULC Class | C Factor |
|------------|----------|
| Bare land  | 0.1      |
| Built-up   | 0.2      |
| Cropland   | 0.25     |
| Forest     | 0        |
| Grassland  | 0.1      |
| Shrubland  | 0.01     |
| Waterbody  | 0        |

**Table S5.** The slope classes with the P-factor values for erosion control practices.

| Slope (%) | Conservation Support Practice (P) Factor <sup>1</sup> |                |           |
|-----------|-------------------------------------------------------|----------------|-----------|
|           | Contouring                                            | Strip Cropping | Terracing |
| 0–7.0     | 0.55                                                  | 0.27           | 0.1       |
| 7.0–11.3  | 0.6                                                   | 0.3            | 0.12      |
| 11.3–17.6 | 0.8                                                   | 0.4            | 0.16      |
| 17.6–26.8 | 0.9                                                   | 0.45           | 0.18      |
| >26.8     | 1                                                     | 0.5            | 0.2       |

**Table S6.** Total and average soil loss per district and the contribution to annual soil loss, mean rainfall, and slopes in 1990.

| District Name | % of the area covered a | Total soil loss (Mt y <sup>-1</sup> ) | Mean erosion (t ha <sup>-1</sup> y <sup>-1</sup> ) | % of annual soil loss | Mean rainfall (mm y <sup>-1</sup> ) | Mean slope (%) |
|---------------|-------------------------|---------------------------------------|----------------------------------------------------|-----------------------|-------------------------------------|----------------|
| Jarso         | 2                       | 0.1                                   | 23                                                 | 2                     | 707                                 | 25             |
| Kombolcha     | 2                       | 0.1                                   | 22                                                 | 1                     | 776                                 | 25             |
| Meta          | 3                       | 0.4                                   | 59                                                 | 5                     | 932                                 | 30             |
| Haro Maya     | 2                       | 0.2                                   | 23                                                 | 2                     | 853                                 | 12             |
| Goro Gutu     | 2                       | 0.3                                   | 56                                                 | 3                     | 812                                 | 26             |
| Gursum        | 3                       | 0.2                                   | 17                                                 | 2                     | 618                                 | 13             |
| Kersa         | 2                       | 0.2                                   | 36                                                 | 2                     | 870                                 | 17             |
| Deder         | 2                       | 0.2                                   | 36                                                 | 3                     | 1012                                | 30             |
| Babile        | 20                      | 1                                     | 17                                                 | 11                    | 512                                 | 9              |
| Kurfa Chele   | 1                       | 0.1                                   | 37                                                 | 1                     | 874                                 | 21             |
| Bedeno        | 4                       | 0.4                                   | 38                                                 | 5                     | 887                                 | 27             |
| Girawa        | 6                       | 1                                     | 32                                                 | 6                     | 787                                 | 21             |
| Malka Balo    | 6                       | 1                                     | 70                                                 | 12                    | 854                                 | 22             |
| Golo Oda      | 16                      | 3                                     | 60                                                 | 29                    | 728                                 | 13             |
| Fedis         | 5                       | 0.2                                   | 13                                                 | 2                     | 679                                 | 7              |
| Midega Tola   | 3                       | 0.2                                   | 20                                                 | 2                     | 598                                 | 11             |
| Meyu Muleke   | 15                      | 1                                     | 26                                                 | 12                    | 623                                 | 12             |
| Chinaksen     | 6                       | 0.3                                   | 18                                                 | 3                     | 600                                 | 14             |
| Total         | 100                     | 9                                     | 33                                                 | 100                   | 687                                 | 15             |

**Table S7.** Total and mean soil loss per district and the contribution to annual soil loss, mean rainfall, and slopes in 2000.

| District Name | % of the area covered | Total soil loss (Mt y <sup>-1</sup> ) | Mean erosion (t ha <sup>-1</sup> y <sup>-1</sup> ) | % of annual soil loss | Mean rainfall (mm y <sup>-1</sup> ) | Mean slope (%) |
|---------------|-----------------------|---------------------------------------|----------------------------------------------------|-----------------------|-------------------------------------|----------------|
| Jarso         | 2                     | 0.3                                   | 54                                                 | 2                     | 663                                 | 25             |
| Kombolcha     | 2                     | 0.3                                   | 56                                                 | 2                     | 726                                 | 25             |
| Meta          | 3                     | 1                                     | 172                                                | 9                     | 903                                 | 30             |
| Haro Maya     | 2                     | 0.2                                   | 28                                                 | 1                     | 801                                 | 12             |
| Goro Gutu     | 2                     | 0.4                                   | 87                                                 | 3                     | 785                                 | 26             |
| Gursum        | 3                     | 0.3                                   | 29                                                 | 2                     | 575                                 | 13             |
| Kersa         | 2                     | 0.3                                   | 61                                                 | 2                     | 842                                 | 17             |
| Deder         | 2                     | 1                                     | 146                                                | 7                     | 964                                 | 30             |
| Babile        | 20                    | 2                                     | 27                                                 | 11                    | 457                                 | 9              |
| Kurfa Chele   | 1                     | 0.2                                   | 65                                                 | 1                     | 838                                 | 21             |
| Bedeno        | 4                     | 1                                     | 97                                                 | 7                     | 825                                 | 27             |
| Girawa        | 6                     | 1                                     | 63                                                 | 7                     | 734                                 | 21             |
| Malka Balo    | 6                     | 2                                     | 120                                                | 13                    | 769                                 | 22             |
| Golo Oda      | 16                    | 2                                     | 52                                                 | 17                    | 598                                 | 13             |
| Fedis         | 5                     | 0.2                                   | 16                                                 | 1                     | 627                                 | 7              |
| Midega Tola   | 3                     | 0.4                                   | 38                                                 | 3                     | 536                                 | 11             |
| Meyu Muleke   | 15                    | 1                                     | 26                                                 | 8                     | 497                                 | 12             |
| Chinaksen     | 6                     | 0.5                                   | 27                                                 | 3                     | 538                                 | 14             |
| Total         | 100                   | 14                                    | 50                                                 | 100                   | 610                                 | 15             |

**Table S8.** Total and mean soil loss per district and the contribution to annual soil loss, mean rainfall, and slopes in 2010.

| District Name | % of the area covered | Soil loss (Mt y <sup>-1</sup> ) | Mean erosion (t ha <sup>-1</sup> y <sup>-1</sup> ) | % of Annual Soil Loss | Mean rainfall (mm y <sup>-1</sup> ) | Mean slope (%) |
|---------------|-----------------------|---------------------------------|----------------------------------------------------|-----------------------|-------------------------------------|----------------|
| Jarso         | 2                     | 0.2                             | 36                                                 | 2                     | 764                                 | 25             |
| Kombolcha     | 2                     | 0.2                             | 38                                                 | 2                     | 831                                 | 25             |
| Meta          | 3                     | 1                               | 117                                                | 7                     | 988                                 | 30             |
| Haro Maya     | 2                     | 0.2                             | 22                                                 | 1                     | 897                                 | 12             |
| Goro Gutu     | 2                     | 0.1                             | 25                                                 | 1                     | 853                                 | 26             |
| Gursum        | 3                     | 0.2                             | 27                                                 | 2                     | 648                                 | 13             |
| Kersa         | 2                     | 0.2                             | 44                                                 | 2                     | 932                                 | 17             |
| Deder         | 2                     | 0.4                             | 63                                                 | 3                     | 1029                                | 30             |
| Babile        | 20                    | 2                               | 26                                                 | 13                    | 511                                 | 9              |
| Kurfa Chele   | 1                     | 0.1                             | 45                                                 | 1                     | 917                                 | 21             |
| Bedeno        | 4                     | 1                               | 73                                                 | 7                     | 894                                 | 27             |
| Girawa        | 6                     | 1                               | 51                                                 | 7                     | 795                                 | 21             |
| Malka Balo    | 6                     | 2                               | 107                                                | 13                    | 806                                 | 22             |
| Golo Oda      | 16                    | 3                               | 59                                                 | 22                    | 647                                 | 13             |
| Fedis         | 5                     | 0.2                             | 17                                                 | 2                     | 696                                 | 7              |
| Midega Tola   | 3                     | 0.4                             | 42                                                 | 3                     | 591                                 | 11             |
| Meyu Muleke   | 15                    | 1                               | 30                                                 | 10                    | 554                                 | 12             |
| Chinaksen     | 6                     | 0.4                             | 23                                                 | 3                     | 627                                 | 14             |
| Total         | 100                   | 12                              | 44                                                 | 100                   | 672                                 | 15             |

**Table S9.** Total and mean soil loss per district and the contribution to annual soil loss, mean rainfall, and slopes in 2020.

| District Name | % of the area covered | Total soil loss (Mt y <sup>-1</sup> ) | Mean erosion (t ha <sup>-1</sup> y <sup>-1</sup> ) | % of Annual Soil Loss | Mean rainfall (mm y <sup>-1</sup> ) | Mean slope (%) |
|---------------|-----------------------|---------------------------------------|----------------------------------------------------|-----------------------|-------------------------------------|----------------|
| Jarso         | 2                     | 0.3                                   | 42                                                 | 2                     | 739                                 | 25             |
| Kombolcha     | 2                     | 0.1                                   | 27                                                 | 1                     | 799                                 | 25             |
| Meta          | 3                     | 1                                     | 184                                                | 12                    | 963                                 | 30             |
| Haro Maya     | 2                     | 0.1                                   | 21                                                 | 1                     | 881                                 | 12             |
| Goro Gutu     | 2                     | 1                                     | 103                                                | 4                     | 789                                 | 26             |
| Gursum        | 3                     | 0.2                                   | 26                                                 | 2                     | 633                                 | 13             |
| Kersa         | 2                     | 0.3                                   | 65                                                 | 3                     | 899                                 | 17             |
| Deder         | 2                     | 1                                     | 146                                                | 9                     | 1034                                | 30             |
| Babile        | 20                    | 2                                     | 30                                                 | 16                    | 518                                 | 9              |
| Kurfa Chele   | 1                     | 0.1                                   | 42                                                 | 1                     | 933                                 | 21             |
| Bedeno        | 4                     | 1                                     | 63                                                 | 6                     | 923                                 | 27             |
| Girawa        | 6                     | 1                                     | 34                                                 | 5                     | 826                                 | 21             |
| Malka Balo    | 6                     | 1                                     | 77                                                 | 11                    | 846                                 | 22             |
| Golo Oda      | 16                    | 1                                     | 30                                                 | 12                    | 675                                 | 13             |
| Fedis         | 5                     | 0.2                                   | 18                                                 | 2                     | 716                                 | 7              |
| Midega Tola   | 3                     | 0.2                                   | 22                                                 | 2                     | 620                                 | 11             |
| Meyu Muleke   | 15                    | 1                                     | 16                                                 | 6                     | 575                                 | 12             |
| Chinaksen     | 6                     | 0.3                                   | 16                                                 | 3                     | 611                                 | 14             |
| Total         | 100                   | 11                                    | 39                                                 | 100                   | 683                                 | 15             |

**Table S10.** Error matrix of LULC classification accuracies for (a)1990, (b) 2000, (c) 2010, and (d) 2020, in percent (%).

| Classified Data <sup>1</sup> | Reference Data |          |          |        |           |           |           | Total | UA  | CE |
|------------------------------|----------------|----------|----------|--------|-----------|-----------|-----------|-------|-----|----|
|                              | Bare land      | Built-up | Cropland | Forest | Grassland | Shrubland | Waterbody |       |     |    |
| (a)                          |                |          |          |        |           |           |           |       |     |    |
| Bare land                    | 59             | 9        | 2        | 0      | 0         | 0         | 0         | 70    | 84  | 16 |
| Built-up                     | 2              | 41       | 0        | 0      | 0         | 0         | 0         | 43    | 95  | 5  |
| Cropland                     | 2              | 0        | 85       | 2      | 1         | 0         | 0         | 90    | 94  | 6  |
| Forest                       | 1              | 0        | 0        | 66     | 0         | 1         | 0         | 68    | 97  | 3  |
| Grassland                    | 0              | 0        | 0        | 0      | 26        | 1         | 0         | 27    | 96  | 4  |
| Shrubland                    | 1              | 0        | 3        | 2      | 3         | 83        | 0         | 92    | 90  | 10 |
| Waterbody                    | 0              | 0        | 0        | 0      | 0         | 0         | 30        | 30    | 100 | 0  |
| Total                        | 65             | 50       | 90       | 70     | 30        | 85        | 30        | 390   |     |    |
| PA                           | 91             | 82       | 94       | 94     | 87        | 98        | 100       |       | OA  | 93 |
| OE                           | 9              | 18       | 6        | 6      | 13        | 2         | 0         |       |     |    |
| (b)                          |                |          |          |        |           |           |           |       |     |    |
| Bare land                    | 61             | 4        | 2        | 0      | 0         | 0         | 0         | 67    | 91  | 9  |
| Built-up                     | 0              | 43       | 1        | 0      | 0         | 0         | 0         | 44    | 98  | 2  |
| Cropland                     | 4              | 3        | 85       | 0      | 1         | 0         | 0         | 93    | 91  | 9  |
| Forest                       | 0              | 0        | 0        | 67     | 0         | 3         | 0         | 70    | 96  | 4  |
| Grassland                    | 0              | 0        | 0        | 0      | 29        | 0         | 0         | 29    | 100 | 0  |
| Shrubland                    | 0              | 0        | 2        | 3      | 0         | 82        | 0         | 87    | 94  | 6  |
| Waterbody                    | 0              | 0        | 0        | 0      | 0         | 0         | 30        | 30    | 100 | 0  |
| Total                        | 65             | 50       | 90       | 70     | 30        | 85        | 30        | 397   |     |    |
| PA                           | 94             | 86       | 94       | 96     | 97        | 96        | 100       |       | OA  | 95 |
| OE                           | 6              | 14       | 6        | 4      | 3         | 4         | 0         |       |     |    |
| (c)                          |                |          |          |        |           |           |           |       |     |    |
| Bare land                    | 65             | 1        | 0        | 0      | 0         | 0         | 0         | 66    | 98  | 2  |
| Built-up                     | 0              | 44       | 0        | 0      | 0         | 0         | 0         | 44    | 100 | 0  |
| Cropland                     | 0              | 2        | 88       | 0      | 1         | 2         | 0         | 93    | 95  | 5  |
| Forest                       | 0              | 0        | 0        | 68     | 0         | 7         | 1         | 76    | 89  | 11 |
| Grassland                    | 0              | 0        | 0        | 0      | 27        | 0         | 0         | 27    | 100 | 0  |
| Shrubland                    | 0              | 3        | 2.00     | 2      | 2         | 76        | 0         | 85    | 89  | 11 |
| Waterbody                    | 0              | 0        | 0        | 0      | 0         | 0         | 29        | 29    | 100 | 0  |
| Total                        | 65             | 50       | 90       | 70     | 30        | 85        | 30        | 397   |     |    |
| PA                           | 100            | 88       | 98       | 97     | 90        | 89        | 97        |       | OA  | 95 |
| OE                           | 0              | 12       | 2        | 3      | 10        | 11        | 3         |       |     |    |
| (d)                          |                |          |          |        |           |           |           |       |     |    |
| Bare land                    | 60             | 0        | 0        | 1      | 0         | 0         | 0         | 61    | 98  | 2  |
| Built-up                     | 1              | 47       | 1        | 0      | 0         | 0         | 0         | 49    | 96  | 4  |
| Cropland                     | 3              | 0        | 88       | 0      | 0         | 1         | 0         | 92    | 96  | 4  |
| Forest                       | 0              | 0        | 0        | 66     | 0         | 3         | 0         | 69    | 96  | 4  |
| Grassland                    | 0              | 0        | 0        | 0      | 28        | 1         | 0         | 29    | 97  | 3  |
| Shrubland                    | 1              | 3        | 1        | 3      | 2         | 80        | 0         | 90    | 89  | 11 |
| Waterbody                    | 0              | 0        | 0        | 0      | 0         | 0         | 30        | 30    | 100 | 0  |
| Total                        | 65             | 50       | 90       | 70     | 30        | 85        | 30        | 399   |     |    |
| PA                           | 92             | 94       | 98       | 94     | 93        | 94        | 100       |       | OA  | 95 |
| OE                           | 8              | 6        | 2        | 6      | 7         | 6         | 0         |       |     |    |

<sup>1</sup>The diagonal values in the italics-down error matrix tables represent reference points accurately classified for each LULC class, while off-diagonal entries represent misclassified points that conform to individual classes.

**Table S11.** Area of LULC change (km<sup>2</sup>) relative to the 1990–2000 period.

| LULC Class | Bare land | Built-up | Cropland | Forestland | Grassland | Shrubland | Waterbody | 1990   |
|------------|-----------|----------|----------|------------|-----------|-----------|-----------|--------|
| Bare land  | 1,007     | 6        | 1,011    | 12         | 4         | 107       | 0         | 2,148  |
| Built-up   | 7         | 1        | 17       | 1          | 0         | 3         | 0         | 29     |
| Cropland   | 890       | 23       | 9,324    | 493        | 2         | 1,506     | 1         | 12,240 |
| Forestland | 50        | 3        | 847      | 1,288      | 1         | 327       | 2         | 2,518  |
| Grassland  | 39        | 1        | 50       | 1          | 6         | 14        | 0         | 111    |
| Shrubland  | 383       | 20       | 5,770    | 736        | 16        | 1,060     | 2         | 7,986  |
| Waterbody  | 0         | 0        | 1        | 1          | 0         | 1         | 6         | 8      |
| 2000       | 2,377     | 54       | 17,019   | 2,532      | 30        | 3,018     | 10        | 25,040 |
| 2000–1990  | 229       | 26       | 4778     | 14         | –81       | –4968     | 2         |        |

**Table S12.** Area of LULC change (km<sup>2</sup>) relative to the 2000–2010 period.

| LULC Class | Bare land | Built-up | Cropland | Forestland | Grassland | Shrubland | Waterbody | 2000   |
|------------|-----------|----------|----------|------------|-----------|-----------|-----------|--------|
| Bare land  | 1,092     | 7        | 993      | 7          | 7         | 271       | 0         | 2,377  |
| Built-up   | 6         | 3        | 15       | 4          | 0         | 26        | 0         | 54     |
| Cropland   | 1,300     | 34       | 12,034   | 588        | 20        | 3,042     | 0         | 17,019 |
| Forestland | 6         | 5        | 778      | 928        | 1         | 814       | 0         | 2,532  |
| Grassland  | 5         | 0        | 7        | 1          | 3         | 14        | 0         | 30     |
| Shrubland  | 124       | 6        | 1,478    | 351        | 12        | 1,048     | 0         | 3,018  |
| Waterbody  | 0         | 0        | 3        | 1          | 1         | 3         | 3         | 10     |
| 2010       | 2,534     | 55       | 15,308   | 1,879      | 43        | 5,217     | 3         | 25,040 |
| 2010–2000  | 158       | 0.3      | –1,711   | –653       | 13        | 2,199     | –7        |        |

**Table S13.** Area of LULC change (km<sup>2</sup>) relative to the 2010–2020 period.

| LULC Class | Bare land | Built-up | Cropland | Forestland | Grassland | Shrubland | Waterbody | 2010  |
|------------|-----------|----------|----------|------------|-----------|-----------|-----------|-------|
| Bare land  | 790       | 24       | 1116     | 10         | 15        | 579       | 1         | 2534  |
| Built-up   | 4         | 7        | 22       | 6          | 0         | 15        | 0         | 55    |
| Cropland   | 598       | 59       | 9219     | 422        | 57        | 4950      | 4         | 15308 |
| Forestland | 3         | 7        | 433      | 996        | 1         | 437       | 3         | 1879  |
| Grassland  | 3         | 0        | 7        | 1          | 6         | 26        | 0         | 43    |
| Shrubland  | 76        | 43       | 1721     | 651        | 24        | 2698      | 6         | 5217  |
| Waterbody  | 0         | 0        | 0        | 0          | 0         | 0         | 3         | 3     |
| 2020       | 1474      | 139      | 12518    | 2086       | 101       | 8705      | 16        | 25040 |
| 2020–2010  | –1061     | 84       | –2790    | 207        | 58        | 3488      | 13        |       |

**Table S14.** LULC changes and associated soil erosion rates (in t ha<sup>-1</sup> yr<sup>-1</sup>).

|            | Bare land | Built-up | Cropland | Forest | Grassland | Shrubland |
|------------|-----------|----------|----------|--------|-----------|-----------|
| 1990–2000  |           |          |          |        |           |           |
| Bare land  | 1         | –3       | 5        | –3     | –3        | –4        |
| Built-up   | 1         | 0        | 4        | –0.5   | 0.4       | 1         |
| Cropland   | –6        | –8       | 1        | –19    | –9        | –8        |
| Forest     | 5         | 0.2      | 17       | 0      | 0.4       | 1         |
| Grassland  | 3         | –1       | 6        | –1     | 0         | 1         |
| Shrubland  | 4         | –0.5     | 4        | –2     | –0.3      | 0.1       |
| 2000–2010  |           |          |          |        |           |           |
| Bare land  | –0.4      | –2       | 5        | –4     | –3        | –3        |
| Built-up   | 2         | 0        | 6        | –0.3   | 0.1       | 0.6       |
| Cropland   | –5        | –6       | –0.5     | –16    | –11       | –5        |
| Forest     | 5         | 0.2      | 16       | 0      | 1         | 2         |
| Grassland  | 10        | –3       | 32       | –0.7   | –0.1      | 0.7       |
| Shrubland  | 3         | –1       | 10       | –1.4   | –1        | –0.1      |
| 2010–2020  |           |          |          |        |           |           |
| Bare land  | –0.1      | –2       | 5        | –1     | –11       | –3        |
| Built-up   | 1         | 0        | 4        | –0.4   | 0.3       | 1         |
| Cropland   | –5        | –7       | –0.1     | –21    | –30       | –12       |
| Forestland | 2         | 0.2      | 11       | 0      | 1         | 1         |
| Grassland  | 3         | –1       | 8        | –1     | 0         | 1         |
| Shrubland  | 3         | –8       | 8        | –2     | –1        | 0         |

## Reference

74. Woldemariam, G.W.; Tibebe, D.; Mengesha, T.E.; Gelete, T.B. Machine-Learning Algorithms for Land Use Dynamics in Lake Haramaya Watershed, Ethiopia. *Model. Earth Syst. Environ.* **2021**, *8*, 3719–3736. <https://doi.org/10.1007/s40808-021-01296-0>.
